# Supplementary material for: Trends and Burden of Pulmonary Arterial Hypertension at Global, Regional, and National Levels from 1990 to 2021: Findings from the 2021 Global B urden of Disease Study
Source: Research Square preprint supplement (doi:10.21203/rs.3.rs-5746572/v1), 2025-01-09
Supplement: Supplementary file 1 [file 448ac73cb43e9801e9385cfa.xlsx]

## Sheet: Sheet1
Table 1 The case number and ASR of PAH in 1990 and 2021 by SDI quintiles and by GBD regions, with EAPC from 1990 to 2021
GBD data		Incidence					Deaths					DALYs
		1990		2021		EAPC（1990-2021）(95% CI)	1990		2021		EAPC（1990-2021）(95% CI)	1990		2021		EAPC（1990-2021）(95% CI)
		All ages（numbers）	Age-standardised rate（per 100,000 people）	All ages（numbers）	Age-standardised rate（per 100,000 people）		All ages（numbers）	Age-standardised rate（per 100,000 people）	All ages（numbers）	Age-standardised rate（per 100,000 people）		All ages（numbers）	Age-standardised rate（per 100,000 people）	All ages（numbers）	Age-standardised rate（per 100,000 people）
Global
	Both	105703.31(86381.45,130334.30)	2.30(1.87,2.82)	191808.22(155356.95,235787.14)	2.28(1.85,2.80)	0.03(0.01,0.06)	14842.49(12369.86,17484.86)	0.35(0.29,0.42)	22020.53(18239.16,25351.58)	0.27(0.23,0.32)	-0.57(-0.73,-0.41)	687419.33(535240.76,813086.26)	13.21(10.78,15.36)	642104.29(552272.69,728993.24)	8.24(7.14,9.39)	-1.31(-1.44,-1.19)
	Male	39421.32(32159.43,48676.72)	1.75(1.42,2.13)	73126.54(58943.78,89629.37)	1.78(1.44,2.17)	0.15(0.12,0.17)	7326.23(5916.90,8714.56)	0.37(0.29,0.46)	9578.59(7516.26,11703.37)	0.27(0.21,0.33)	-0.73(-0.92,-0.54)	369685.76(316034.69,424978.10)	14.09(11.89,16.35)	299636.21(246725.64,348330.88)	8.06(6.72,9.36)	-1.54(-1.69,-1.40)
	Female	66282.00(54058.16,81489.14)	2.81(2.29,3.46)	118681.68(95923.29,146291.08)	2.75(2.24,3.39)	-0.02(-0.04,-0.00)	7516.26(5058.50,10160.83)	0.34(0.23,0.45)	12441.95(10000.92,15375.96)	0.28(0.22,0.34)	-0.43(-0.57,-0.29)	317733.56(194732.49,444008.80)	12.32(7.78,16.80)	342468.08(282651.68,430644.94)	8.39(6.92,10.53)	-1.07(-1.18,-0.96)
SDI quintiles
	High-middle SDI	27439.19(22296.22,33800.48)	2.61(2.12,3.21)	42635.88(34236.20,52931.66)	2.54(2.07,3.12)	0.11(0.01,0.22)	4326.29(3594.30,5141.35)	0.35(0.31,0.43)	3213.79(2771.59,3908.36)	0.24(0.20,0.29)	-1.07(-1.28,-0.87)	127637.61(106711.08,154437.66)	13.14(10.91,16.04)	99448.16(85757.43,117639.39)	6.48(5.61,7.87)	-2.20(-2.36,-2.04)
	Middle SDI	29051.33(23769.47,35768.60)	2.07(1.68,2.54)	59666.73(48064.58,73648.38)	2.21(1.80,2.71)	0.21(0.14,0.28)	7548.44(5141.35,9025.54)	0.45(0.35,0.58)	4728.53(3774.35,5852.09)	0.33(0.22,0.39)	-0.63(-0.89,-0.36)	210945.57(172856.77,258349.09)	14.29(11.66,17.69)	197170.68(148781.47,232321.22)	8.23(6.26,9.70)	-1.40(-1.62,-1.18)
	Low-middle SDI	15078.70(12416.61,18609.14)	1.77(1.43,2.15)	32714.76(26546.45,40620.35)	1.90(1.53,2.33)	0.27(0.24,0.30)	3727.67(2756.51,5091.39)	0.35(0.22,0.47)	3124.60(2219.57,3904.35)	0.26(0.18,0.38)	-0.71(-0.79,-0.63)	195280.82(117185.14,245590.74)	14.92(10.74,18.41)	156400.32(122426.28,194166.50)	9.07(7.05,11.60)	-1.33(-1.43,-1.24)
	High SDI	27053.75(21977.20,33298.35)	2.67(2.17,3.27)	41452.29(33444.95,51587.94)	2.64(2.15,3.23)	-0.02(-0.05,0.01)	4620.83(3919.09,5054.49)	0.26(0.24,0.28)	2616.66(2379.31,2849.99)	0.22(0.19,0.23)	-0.56(-0.75,-0.37)	81791.97(77184.68,88110.33)	9.16(8.71,9.90)	93181.57(84873.41,99191.50)	6.16(5.76,6.49)	-1.39(-1.58,-1.21)
	Low SDI	6965.74(5736.97,8608.69)	2.08(1.68,2.53)	15180.80(12474.43,18747.09)	1.94(1.58,2.36)	-0.21(-0.30,-0.13)	1781.76(1146.62,2543.99)	0.32(0.15,0.51)	1145.05(740.49,1754.94)	0.27(0.15,0.40)	-0.33(-0.44,-0.22)	71124.94(48628.45,111613.69)	12.42(7.78,19.19)	95341.84(67470.91,133049.95)	9.30(6.08,13.20)	-0.78(-0.85,-0.70)
GBD regions
	Southeast Asia	6365.98(5233.68,7851.60)	1.77(1.43,2.17)	13615.88(11019.31,16956.99)	1.90(1.54,2.32)	0.24(0.07,0.41)	741.47(525.47,1849.86)	0.15(0.09,0.43)	505.75(339.93,1094.37)	0.12(0.08,0.32)	-0.70(-0.78,-0.61)	27785.81(18241.51,51942.76)	6.31(4.28,12.72)	31111.77(22912.53,58708.38)	4.65(3.39,9.25)	-0.92(-1.01,-0.84)
	Central Europe	3455.75(2820.58,4227.73)	2.52(2.08,3.05)	3520.66(2863.67,4311.25)	2.30(1.89,2.79)	-0.12(-0.22,-0.02)	437.61(397.77,478.87)	0.26(0.22,0.28)	354.96(309.07,393.90)	0.21(0.19,0.23)	-0.71(-0.98,-0.44)	11026.27(9783.72,12154.07)	8.15(7.25,8.95)	10423.53(9511.83,11459.38)	6.05(5.50,6.67)	-1.01(-1.26,-0.77)
	East Asia	22867.49(18512.91,28350.61)	2.07(1.68,2.55)	42486.04(33929.79,53043.15)	2.23(1.81,2.75)	0.38(0.33,0.43)	7489.97(4986.46,9266.10)	0.59(0.45,0.81)	4114.75(3141.43,5526.06)	0.41(0.28,0.50)	-0.57(-0.96,-0.17)	151596.32(117393.64,205773.17)	15.78(12.34,21.21)	154740.44(102939.01,190399.49)	8.84(5.99,11.01)	-1.32(-1.69,-0.96)
	Oceania	91.52(74.65,112.48)	1.98(1.60,2.40)	196.27(158.79,241.29)	1.80(1.45,2.17)	0.03(-0.10,0.16)	24.94(16.69,43.31)	0.28(0.18,0.53)	11.88(7.61,19.25)	0.24(0.16,0.48)	-0.54(-0.60,-0.49)	704.47(448.46,1090.11)	10.85(7.02,17.55)	1454.61(988.20,2410.51)	10.14(6.90,17.10)	-0.22(-0.26,-0.17)
	Western Europe	15675.19(12581.68,19293.62)	3.22(2.62,3.95)	23620.94(19120.73,29197.29)	3.56(2.92,4.35)	0.32(0.28,0.35)	1787.52(1533.39,1942.67)	0.24(0.21,0.27)	1232.96(1093.96,1380.14)	0.18(0.16,0.19)	-0.76(-1.28,-0.23)	34599.00(31742.98,38280.87)	8.27(7.69,9.18)	34042.54(31024.44,36440.02)	5.05(4.75,5.32)	-1.55(-2.01,-1.09)
	Central Latin America	3262.25(2678.67,3991.26)	2.71(2.21,3.30)	8421.49(6855.57,10382.57)	3.25(2.64,3.99)	0.28(0.07,0.49)	201.26(176.86,230.33)	0.16(0.14,0.19)	179.80(157.27,209.53)	0.08(0.07,0.10)	-2.54(-2.90,-2.17)	9966.21(8843.65,11854.81)	6.12(5.40,7.16)	7245.55(6390.76,8406.75)	3.00(2.63,3.51)	-2.67(-3.00,-2.34)
	South Asia	12896.59(10582.38,15994.26)	1.58(1.28,1.93)	29560.95(23835.10,36926.63)	1.71(1.38,2.09)	0.28(0.27,0.30)	3548.80(2321.09,5531.78)	0.31(0.17,0.50)	2385.25(1502.02,3417.93)	0.25(0.16,0.42)	-0.48(-0.59,-0.38)	136086.45(77808.07,184381.01)	12.24(7.79,17.12)	136562.72(97809.04,189353.32)	8.54(6.02,12.46)	-0.95(-1.03,-0.87)
	Eastern Europe	8178.82(6670.46,10049.29)	3.21(2.65,3.91)	7686.23(6263.74,9489.33)	2.83(2.32,3.43)	-0.15(-0.48,0.19)	278.32(257.85,300.35)	0.24(0.22,0.27)	562.86(511.92,651.32)	0.09(0.08,0.10)	-3.78(-4.20,-3.36)	20628.22(18780.63,23859.55)	9.23(8.47,10.49)	8356.54(7760.37,8996.01)	3.32(3.10,3.56)	-3.99(-4.41,-3.57)
	Australasia	669.77(543.50,828.03)	2.99(2.44,3.70)	1166.81(935.86,1444.34)	2.83(2.29,3.44)	-0.13(-0.17,-0.09)	57.71(49.08,64.86)	0.21(0.18,0.26)	45.48(39.15,57.18)	0.11(0.10,0.13)	-2.06(-2.51,-1.60)	1514.25(1337.11,1856.25)	7.37(6.49,9.06)	1433.51(1305.35,1562.91)	3.67(3.38,3.99)	-2.33(-2.82,-1.84)
	Central Asia	1408.73(1145.19,1726.77)	2.46(2.01,3.00)	2161.86(1757.90,2676.53)	2.33(1.90,2.85)	-0.06(-0.15,0.04)	318.52(260.93,381.55)	0.40(0.31,0.47)	208.15(162.56,239.83)	0.41(0.34,0.48)	0.30(0.06,0.54)	9071.21(7195.10,10645.59)	14.14(11.27,16.45)	11618.52(9513.94,14201.81)	12.91(10.61,15.60)	-0.33(-0.55,-0.10)
	Southern Sub-Saharan Africa	795.76(658.44,966.58)	2.12(1.73,2.56)	1596.23(1287.45,1944.80)	2.28(1.85,2.76)	0.09(0.03,0.16)	71.71(52.97,85.71)	0.12(0.08,0.17)	42.62(32.26,58.42)	0.11(0.08,0.13)	-0.03(-0.27,0.21)	2187.75(1666.89,2874.65)	4.70(3.65,6.37)	3211.87(2359.18,3891.38)	4.33(3.21,5.20)	-0.02(-0.27,0.22)
	High-income Asia Pacific	6368.84(5211.58,7811.87)	3.25(2.67,3.97)	9167.25(7427.03,11361.78)	3.01(2.47,3.68)	-0.20(-0.24,-0.17)	1048.79(825.84,1200.54)	0.26(0.24,0.27)	433.74(409.85,459.25)	0.23(0.20,0.26)	-0.46(-0.60,-0.32)	18474.26(17689.14,19467.12)	12.03(11.43,12.79)	19988.36(17441.90,21997.18)	8.31(7.74,8.87)	-1.50(-1.71,-1.28)
	High-income North America	5984.09(4856.05,7324.59)	1.87(1.53,2.29)	8625.44(6917.78,10745.03)	1.73(1.40,2.12)	-0.24(-0.35,-0.13)	1879.78(1619.72,2042.97)	0.32(0.28,0.35)	1064.41(946.58,1166.98)	0.29(0.26,0.31)	-0.45(-0.62,-0.28)	30206.11(27736.12,32714.69)	10.13(9.39,10.99)	38372.60(35059.63,40844.36)	7.71(7.17,8.18)	-1.14(-1.33,-0.94)
	Caribbean	778.03(634.80,953.72)	2.56(2.08,3.13)	1228.93(987.13,1505.96)	2.39(1.93,2.93)	-0.32(-0.43,-0.21)	95.37(65.56,129.66)	0.38(0.28,0.49)	124.17(83.37,168.88)	0.20(0.13,0.29)	-2.53(-2.79,-2.28)	7398.34(4169.76,11145.34)	19.72(11.78,28.82)	5071.21(2987.61,7877.35)	11.73(6.48,18.74)	-2.01(-2.20,-1.82)
	Andean Latin America	812.23(666.88,996.56)	2.91(2.35,3.58)	1777.16(1434.00,2193.65)	2.77(2.24,3.40)	-0.22(-0.33,-0.12)	91.30(71.95,119.39)	0.28(0.21,0.35)	83.53(56.01,111.88)	0.16(0.12,0.20)	-1.70(-1.98,-1.43)	5049.04(2977.32,7421.86)	11.92(7.83,16.43)	3543.75(2795.10,4489.99)	5.73(4.52,7.28)	-2.11(-2.36,-1.85)
	North Africa and Middle East	4967.64(4055.92,6153.23)	2.02(1.64,2.49)	11590.78(9389.49,14435.62)	2.03(1.64,2.49)	0.03(-0.21,0.26)	1895.82(1328.35,2305.00)	0.77(0.56,1.00)	2141.76(1308.85,2739.26)	0.44(0.31,0.53)	-1.36(-1.51,-1.20)	145728.05(74878.55,204070.24)	35.84(21.25,46.14)	80752.72(58085.82,98810.33)	14.81(10.76,17.96)	-2.43(-2.57,-2.28)
	Eastern Sub-Saharan Africa	2874.64(2358.67,3535.65)	2.40(1.94,2.92)	5907.48(4822.15,7343.53)	2.09(1.70,2.53)	-0.71(-0.87,-0.54)	467.75(219.41,877.96)	0.27(0.12,0.52)	365.55(216.88,686.71)	0.18(0.07,0.34)	-1.46(-1.51,-1.42)	23147.66(14694.41,45765.25)	11.11(6.18,21.17)	26604.77(14265.05,49615.49)	6.85(3.30,12.62)	-1.62(-1.67,-1.58)
	Tropical Latin America	2885.30(2356.80,3541.16)	2.35(1.90,2.88)	6238.60(5019.81,7679.45)	2.48(2.00,3.04)	0.11(-0.06,0.29)	779.39(713.74,822.48)	0.37(0.35,0.39)	394.12(372.80,412.48)	0.32(0.29,0.34)	-0.55(-1.10,0.00)	19064.93(17856.02,20357.09)	14.18(13.35,14.98)	24234.95(23001.96,25403.31)	10.22(9.65,10.78)	-1.12(-1.68,-0.56)
	Western Sub-Saharan Africa	3111.80(2565.50,3828.73)	2.42(1.96,2.97)	9318.55(7635.34,11570.12)	2.97(2.40,3.63)	0.98(0.78,1.18)	523.27(305.71,773.92)	0.25(0.09,0.51)	334.68(194.92,616.46)	0.17(0.07,0.28)	-1.38(-1.50,-1.26)	19834.31(13552.61,38853.02)	9.34(5.22,16.94)	32071.03(22084.07,47221.86)	6.50(3.77,9.47)	-1.14(-1.27,-1.00)
	Southern Latin America	1280.90(1039.53,1574.37)	2.69(2.18,3.30)	2227.32(1800.20,2759.99)	2.82(2.29,3.48)	0.10(0.05,0.15)	150.04(138.46,161.77)	0.36(0.32,0.40)	169.34(150.60,186.22)	0.18(0.17,0.20)	-2.06(-2.26,-1.86)	7983.40(7181.48,8803.28)	16.28(14.65,17.95)	4739.32(4439.05,5091.53)	6.55(6.13,7.07)	-2.87(-3.02,-2.72)
	Central Sub-Saharan Africa	971.97(795.46,1205.95)	2.79(2.26,3.44)	1693.37(1377.93,2093.53)	1.86(1.49,2.24)	-1.14(-1.30,-0.99)	131.19(61.77,237.43)	0.24(0.11,0.47)	86.74(54.87,162.55)	0.19(0.08,0.37)	-0.67(-0.74,-0.60)	5367.28(3258.01,10524.66)	9.09(5.65,17.13)	6524.00(3586.22,11025.25)	6.16(2.94,11.09)	-1.14(-1.24,-1.04)
